# Supplementary material
Source: PubMed Central journal article supplement (PMC6465185)
Supplement: NIHMS1505058-supplement-3.pdf [file NIHMS1505058-supplement-3.pdf]

**Video 1.** Indocyanine green angiography (ICG-A) of the left eye at baseline showing leakage of the choroidal neovascular membrane.

**Video 2.** Indocyanine green angiography (ICG-A) of the right eye at baseline showing leakage of the choroidal neovascular membrane.

**List of Supplemental Digital Content**

Supplemental Digital Content 1. Figure that demonstrates drusen and fundus changes in each eye with color fundus photograph and SD-OCT at baseline examination. tif

Supplemental Digital Content 2. Figure that demonstrates fluorescein angiography of both eyes at baseline. tif

Supplemental Digital Content 3. Video that demonstrates leakage of the choroidal neovascular membrane in the left eye on indocyanine green angiography. m4v

Supplemental Digital Content 4. Video that demonstrates leakage of the choroidal neovascular membrane in the right eye on indocyanine green angiography. m4v

Supplemental Digital Content 5. Figure that demonstrates the fundus appearance of both eyes 10 years after presentation on color fundus photograph, fundus autofluorescence, and OCT images. tif

Supplemental Digital Content 6. Figure that demonstrates the similar anatomic appearance of the subclinical choroidal neovascular complex in the right eye on indocyanine green angiography at baseline and SD-OCT 10 years after presentation. tif
